# Supplementary material for: Colorimetric detection of streptomycin in milk based on peroxidase-mimicking catalytic activity of gold nanoparticles
Source: Royal Society of Chemistry journal article supplement (doi:10.1039/c7ra06434a), 2017-01-01
Supplement: c7ra06434a1.pdf [file c7ra06434a1.pdf]

## Colorimetric detection of streptomycin in milk based on the peroxidase mimics catalytic activity of gold nanoparticles

Jing Zhao, Yuangen Wu\*, Han Tao, Huayun Chen, Wenping Yang, Shuyi Qiu

Guizhou Province Key Laboratory of Fermentation Engineering and Biopharmacy; School of Liquor and Food Engineering, Guizhou University, Guiyang, 550025, Guizhou Province, P. R. China. E-mail: wuyg1357@163.com.

### Electronic Supplementary Information

(Including Supplementary table and figures)

#### References of Table S1

1. N. Mohammad Danesh, M. Ramezani, A. Sarreshtehdar Emrani, K. Abnous and S. M. Taghdisi, *Biosens Bioelectron*, 2016, **75**, 123-128.
2. J. Xue, J. Liu, C. Wang, Y. Tian and N. Zhou, *Anal. Methods*, 2016, **8**, 1981-1988.
3. Y. Yin, X. Qin, Q. Wang and Y. Yin, *RSC Advances*, 2016, **6**, 39401-39408.
4. J. Yin, W. Guo, X. Qin, J. Zhao, M. Pei and F. Ding, *Sensors and Actuators B: Chemical*, 2017, **241**, 151-159.
5. J. Yin, W. Guo, X. Qin, M. Pei, L. Wang and F. Ding, *New Journal of Chemistry*, 2016, **40**, 9711-9718.
6. A. S. Emrani, N. M. Danesh, P. Lavaee, M. Ramezani, K. Abnous and S. M. Taghdisi, *Food chemistry*, 2016, **190**, 115-121.
7. S. M. Taghdisi, N. M. Danesh, M. A. Nameghi, M. Ramezani and K. Abnous, *Food chemistry*, 2016, **203**, 145-149.
8. V. Soheili, S. M. Taghdisi, M. H. Khayyat, B. S. F. Bazzaz, M. Ramezani and K. Abnous, *Microchimica Acta*, 2016, **183**, 1687-1697.
9. N. Zhou, J. Wang, J. Zhang, C. Li, Y. Tian and J. Wang, *Talanta*, 2013, **108**, 109-116.

## Supplementary table:

**Table S1** Comparison with earlier reported methods based on aptamer for streptomycin detection

| Methodology                | Transduction principle                                                                                                               | Linear range (nM) | LOD (nM) | Refs.     |
|----------------------------|--------------------------------------------------------------------------------------------------------------------------------------|-------------------|----------|-----------|
| Electrochemical Aptasensor | Disassembly of aptamer-complementary strand conjugate to release redox probe to the electrode surface                                | 30–1500           | 11.4     | [1]       |
|                            | Self-assembly of quantum dot (QD) tagged sequences on the electrode surface                                                          | 50–1000           | 10       | [2]       |
|                            | Signal amplification using AuNPs-functionalized magnetic multi-walled carbon nanotube composite                                      | 0.09-172          | 0.01     | [3]       |
|                            | Signal amplification utilizing porous carbon nanosphere and multifunctional graphene composite                                       | 0.09-344          | 0.05     | [4]       |
|                            | Signal amplification utilizing porous carbon nanorods, AuNPs and copper oxide functionalized multi-walled carbon nanotube composites | 0.09–516          | 0.06     | [5]       |
| Fluorescent Aptasensor     | Disassembly of aptamer/FAM-labeled complementary strand dsDNA to quench fluorescence by AuNPs                                        | 30-2000           | 47.6     | [6]       |
|                            | Disassembly of aptamer-complementary strand dsDNA to bind SYBR Gold and turn on fluorescence                                         | 60-1000           | 54.5     | [7]       |
| Colorimetric Aptasensor    | Aggregation of AuNPs caused by the competitive binding of target molecules and aptamer 8-2 sequences in NaCl solution                | 180-1000          | 47.2     | [8]       |
|                            | Aggregation of AuNPs caused by the competitive binding of target molecules and STR1 aptamer sequences in NaCl solution               | 200-1200          | none     | [9]       |
|                            | Enhancement of the peroxidase catalytic activity of AuNPs based on the binding of target molecules and STR1 aptamer sequences        | 100-500           | 86       | This work |

## Supplementary figures:

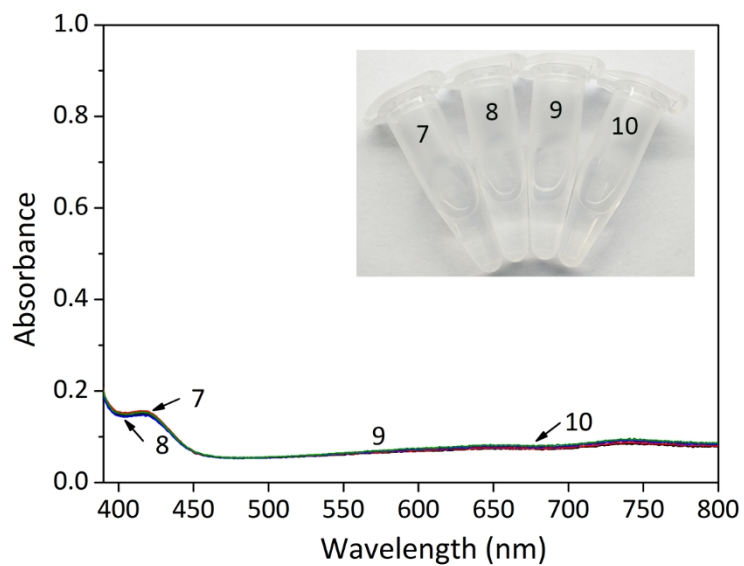

**Figure S1** Absorption spectra and colour of solutions contain different substances. Sample 7: ABTS + H<sub>2</sub>O<sub>2</sub>; Sample 8: STR1 aptamer + ABTS + H<sub>2</sub>O<sub>2</sub> + STR (1 μM); Sample 9: STR1 aptamer + ABTS + H<sub>2</sub>O<sub>2</sub>; Sample 10: ABTS + H<sub>2</sub>O<sub>2</sub> + STR (1 μM). The final concentration of STR1 aptamer is 50 nM.

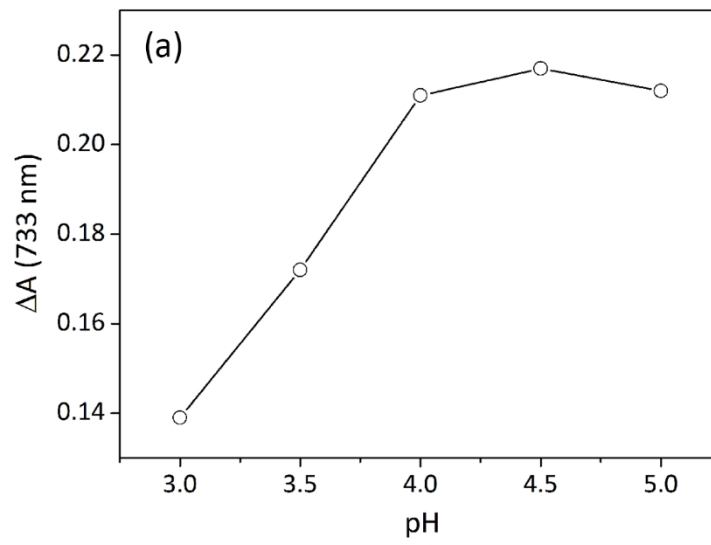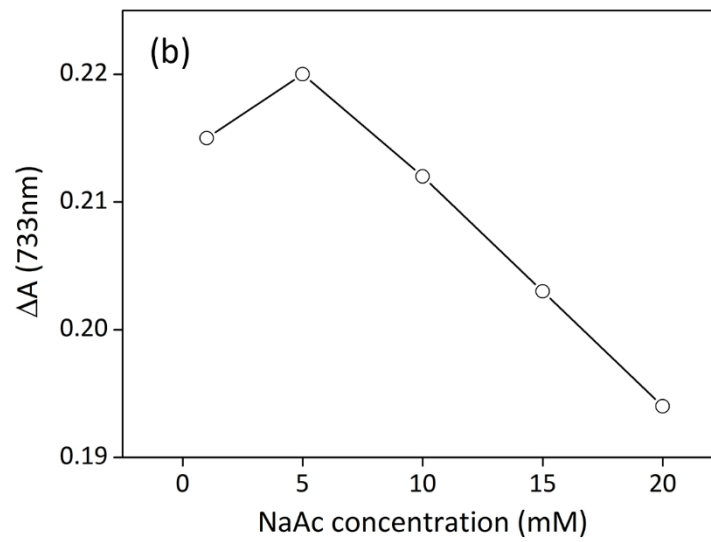

**Figure S2** Effect of buffer conditions on STR detection. (a) The sensing signals of the colorimetric aptasensor treated with 1  $\mu\text{M}$  of STR under different pH. (b) The sensing signals of the colorimetric aptasensor treated with 1  $\mu\text{M}$  of STR under different NaAc concentrations.

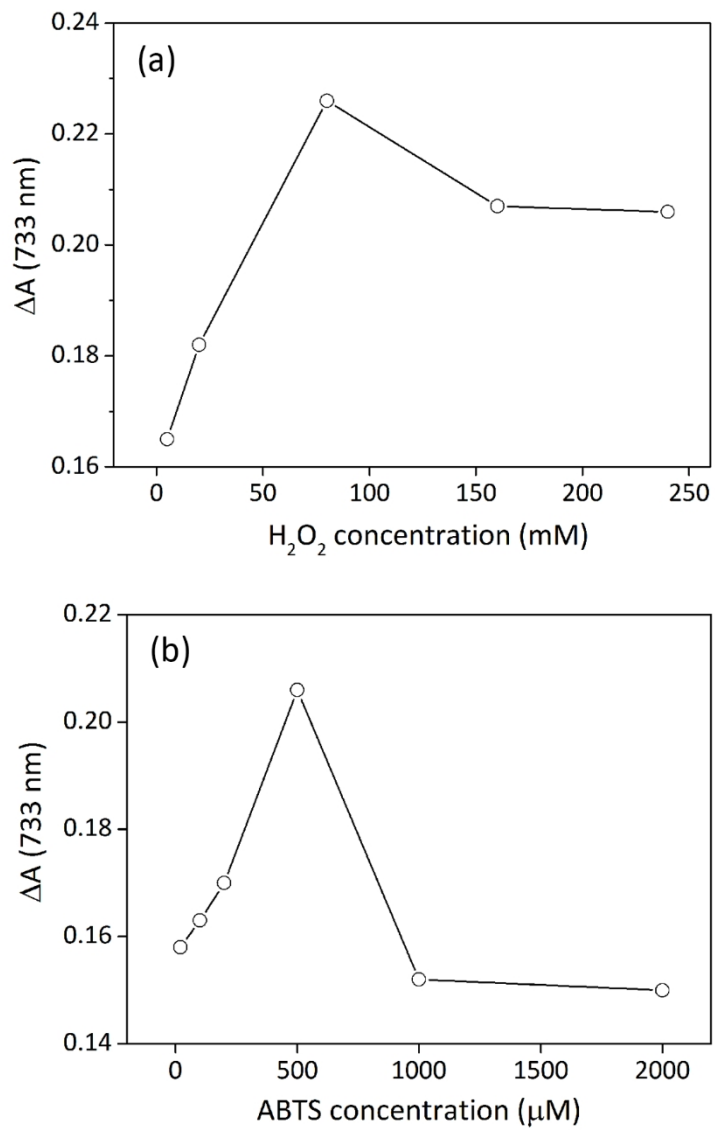

**Figure S3** Effect of substrates on STR detection. (a) The sensing signals of the colorimetric aptasensor treated with 1  $\mu\text{M}$  of STR using different concentrations of  $\text{H}_2\text{O}_2$ . (b) The sensing signals of the colorimetric aptasensor treated with 1  $\mu\text{M}$  of STR using different concentrations of ABTS.

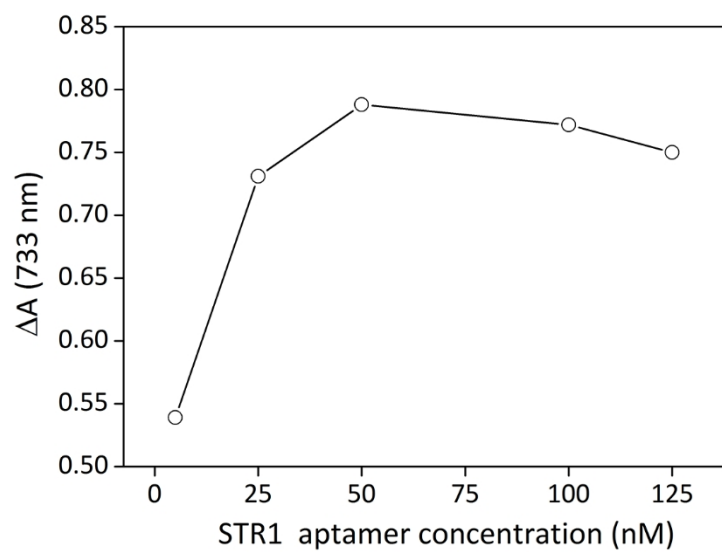

**Figure S4** The sensing signals of the colorimetric aptasensor treated with 1  $\mu\text{M}$  of STR using different STR1 aptamer concentrations.

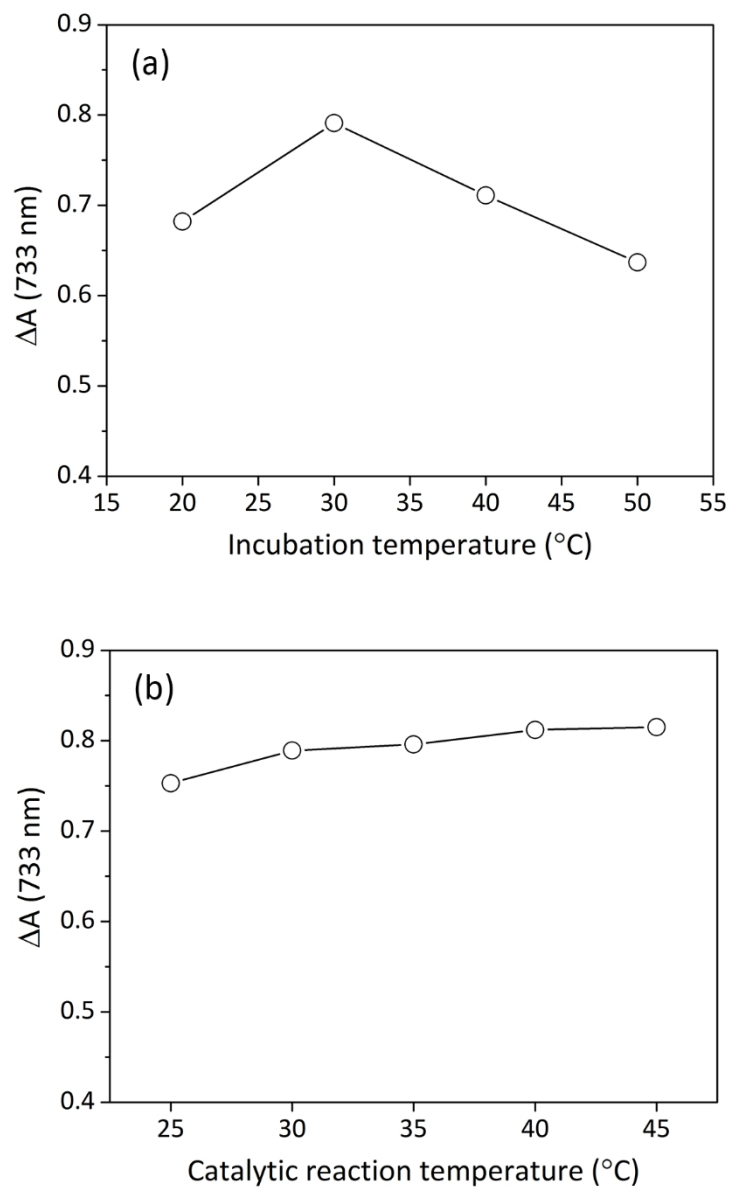

**Figure S5** Effect of temperature on STR detection. (a) The sensing signals of the colorimetric aptasensor treated with 1  $\mu\text{M}$  of STR under different incubation temperature. (b) The sensing signals of the colorimetric aptasensor treated with 1  $\mu\text{M}$  of STR under different catalytic reaction temperature.
